# Supplementary material for: Isoform- and ligand-specific modulation of the adhesion GPCR ADGRL3/Latrophilin3 by a synthetic binder
Source: Nat Commun. 2023 Feb 6;14:635. doi: 10.1038/s41467-023-36312-7 (PMC9902482; doi:10.1038/s41467-023-36312-7)
Supplement: Supplementary file 4 — Source Data [file 41467_2023_36312_MOESM4_ESM.xlsx]

## Sheet: Fig. 1B
		A450
		Control			ADGRL1Lec			ADGRL3Lec			ADGRL3Lec/Olf
	LK24	0.24	0.17	0.24	0.18	0.16	0.29	0.24	0.13	0.24	0.22	0.13	0.14
	LK25	0.19	0.14	0.19	0.22	0.18	0.29	0.26	0.24	0.16	0.25	0.14	0.33
	LK29	0.19	0.18	0.22	0.89	0.98	0.9	1.07	1.05	0.95	0.99	0.95	1.1
	LK30	0.25	0.17	0.12	0.87	0.88	0.88	0.97	0.91	1.08	0.84	0.97	0.88
	LK31	0.32	0.11	0.23	0.84	0.79	0.74	0.89	0.85	0.6	0.85	0.83	0.62
	LK12	0.14	0.21	0.19	0.14	0.19	0.25	0.22	0.2	0.25	0.93	0.97	0.99

## Sheet: Fig. 1G; S3C
		MFI (APC)
	log(LK30) [M]	EV			ADGRL1			ADGRL3			ADGRL3_T842G
	-9.29	7001	9572	7973	20708	21654	21919	27968	28196	26638	26964	25370	26638
	-8.82	6249	9650	9154	27295	23968	27074	31592	33440	32635	30582	29604	29846
	-8.34	9969	11538	10050	27742	27855	44799	40804	41472	38548	37014	34545	36566
	-7.86	10215	12017	12464	36566	40146	39660	49991	64567	63269	48001	41810	45348
	-7.39	14022	18861	17109	54886	58809	58333	79750	89719	89719	65094	59772	55333
	-6.91	25996	25063	30089	100525	102171	101757	181147	150889	140822	96916	96524	103844
	-6.43	25577	65094	52488	182624	190194	181147	283174	253764	232073	159069	161019	99307
	-5.48	21566	65625	46467	207970	184863	216590	291340	310900	277481	165663	168376	164991

## Sheet: Fig. 1F
	ADGRL3_Lec/LK30									ADGRL3_Lec

## Sheet: Fig. 2A
		Firefly (SRE dependent signaling)
		HBS			LK30
	EV control	22811	25529	22635	28099	21355	28656
	ADGRL1	705449	774739	708499	514656	691862	755281
	ADGRL3	1091146	1071244	962483	1734550	1893412	2579291
		Renilla (Tranfection control)
		HBS			LK30
	EV control	24164	22573	21652	30764	29526	25958
	ADGRL1	21018	24560	23986	31580	32050	27930
	ADGRL3	25888	26491	26927	25469	26148	31986
		Firefly/Renilla
		HBS			LK30
	EV control	0.944008	1.13095	1.0454	0.9134	0.723261	1.10394
	ADGRL1	33.564	31.5448	29.538	16.2969	21.587	27.0419
	ADGRL3	42.1487	40.438	35.7442	68.1044	72.4113	80.6381
		Fold increase over EV
		HBS			LK30
	EV control	0.907595	1.08733	1.00508	0.99043	0.791661	1.20834
	ADGRL1	32.2694	30.328	28.3987	17.8381	23.6285	29.5993
	ADGRL3	40.5229	38.8782	34.3654	74.5451	79.2595	88.2642

## Sheet: Fig. 2B
	Firefly (SRE dependent signaling)										Renilla (Tranfection control)
	log(LK30) [M]	hADGRL3				log(LK30) [M]	rADGRL1				log(LK30) [M]	hADGRL3				log(LK30) [M]	rADGRL1
	EV	5379	5101	5825		EV	10584	10348	11477		EV	5891	5026	5454		EV	4583	4818	4922
	-6	747221	839205	809736		-5	99810	97689	117274		-6	6880	6712	5977		-5	4589	4584	5084
	-6.47712	708098	825750	726754		-5.47712	133787	126477	138532		-6.47712	5689	6267	5923		-5.47712	4962	5539	5311
	-6.95424	655947	612198	581440		-5.95424	141274	120784	143265		-6.95424	5990	5021	5407		-5.95424	5559	4691	4952
	-7.43136	533902	469358	503562		-6.43136	141764	124090	115817		-7.43136	6509	5683	5132		-6.43136	4954	4662	4560
	-7.90849	391619	345909	334147		-6.90848	121476	133693	126041		-7.90849	6324	5269	5288		-6.90848	4811	4885	4788
	-8.38561	395244	321885	301688		-7.38561	102987	121831	111684		-8.38561	6518	5544	5507		-7.38561	4607	4366	4426
	-8.86273	322904	282570	277728		-7.86274	53196	122550	125709		-8.86273	5596	5106	5933		-7.86274	2406	4507	4945
	-9.33985	311788	253318	282086		-8.33989	93342	111959	120106		-9.33985	5458	4979	5693		-8.33989	4680	4820	5683
	Firefly/Renilla										Fold increase over EV
	log(LK30) [M]	hADGRL3				log(LK30) [M]	rADGRL1				log(LK30) [M]	hADGRL3				log(LK30) [M]	rADGRL1
	EV	0.913088	1.01492	1.06802		EV	2.3094	2.14778	2.33178		EV	0.914297	1.01627	1.06944		EV	1.02051	0.949091	1.0304
	-6	108.608	125.031	135.475		-5	21.7498	21.3109	23.0673		-6	47.9931	55.2502	59.8657		-5	21.7786	21.3391	23.0978
	-6.47712	124.468	131.762	122.7		-5.47712	26.9623	22.8339	26.084		-6.47712	55.0016	58.2247	54.2205		-5.47712	26.998	22.8641	26.1185
	-6.95424	109.507	121.928	107.535		-5.95424	25.4136	25.748	28.9307		-6.95424	48.3905	53.879	47.5189		-5.95424	25.4472	25.7821	28.969
	-7.43136	82.0252	82.5898	98.122		-6.43136	28.6161	26.6173	25.3985		-7.43136	36.2464	36.4959	43.3595		-6.43136	28.6539	26.6526	25.4321
	-7.90849	61.9258	65.6498	63.1897		-6.90848	25.2496	27.3681	26.3244		-7.90849	27.3647	29.0103	27.9231		-6.90848	25.2831	27.4043	26.3592
	-8.38561	60.6388	58.0601	54.7826		-7.38561	22.3545	27.9045	25.2336		-8.38561	26.7959	25.6564	24.2081		-7.38561	22.3841	27.9414	25.267
	-8.86273	57.7026	55.3408	46.8107		-7.86274	22.1097	27.191	25.4214		-8.86273	25.4984	24.4548	20.6854		-7.86274	22.139	27.227	25.4551
	-9.33985	57.125	50.8773	49.5496		-8.33989	19.9449	23.228	21.1343		-9.33985	25.2432	22.4824	21.8957		-8.33989	20.9713	23.2588	21.1622

## Sheet: Fig. 2C
		Firefly (SRE dependent signaling)
		HBS			LK30
	EV control	5891	5655	4632	5379	5101	5825
	ADGRL3 +SSA	173747	141048	171141	359179	350638	289522
	ADGRL3 -SSA	166883	153693	174018	360598	359532	275411
	ADGRL3 T842G	132717	112741	128389	124756	128284	91769
		Renilla (Tranfection control)
		HBS			LK30
	EV control	5225	4976	4168	5891	5026	5454
	ADGRL3 +SSA	5665	4614	4712	4789	4695	4148
	ADGRL3 -SSA	4806	4493	4323	5253	5786	4688
	ADGRL3 T842G	6327	5527	5208	5246	5458	4934
		Firefly/Renilla
		HBS			LK30
	EV control	1.12746	1.13645	1.11132	0.913088	1.01492	1.06802
	ADGRL3 +SSA	30.6703	30.5696	36.3203	75.0008	74.6833	69.798
	ADGRL3 -SSA	34.7239	34.2072	40.254	68.6461	62.1383	58.7481
	ADGRL3 T842G	20.9763	20.3982	24.6523	23.7812	23.5038	18.5993
		Fold increase over EV
		HBS			LK30
	EV control	1.00212	1.01011	0.987773	0.914297	1.01627	1.06944
	ADGRL3 +SSA	28.883	28.7882	34.2037	75.1001	74.7822	69.8904
	ADGRL3 -SSA	32.7004	32.2138	37.9083	68.737	62.2205	58.8259
	ADGRL3 T842G	19.7539	19.2096	23.2157	23.8127	23.535	18.6239

## Sheet: Fig. 4D
	TEN2_ECR/ADGRL3_ECR complex					TEN2_ECR/ADGRL3_ECR + LK30

## Sheet: Fig. 4E
		FLRT3/ADGRL3/LK30 complex

## Sheet: Fig. 5E
			Aggregation index (%)
	pCMV5/TEN2		25.8617	11.08	17.4682	19.6277	8.24932	25.6819	27.9779	23.4585	29.5121	29.2208	45.1896	44.0262	13.8072	20.9184	41.1228
	ADGRL3/TEN2		90.7883	85.9725	92.104	90.3058	90.0018	92.2078	88.176	93.4217	88.3484	83.5861	74.0039	75.9631	81.3031	87.3301	95.7682
	ADGRL3/TEN2 + LK30		6.07368	2.93199	6.56078	2.23983	5.42369	12.8981	9.16007	10.914	11.7119	14.7323	14.0578	11.6602	14.2174	21.0501	16.6536
	ADGRL3/TEN2 + LK12		89.3813	81.5434	79.4311	84.8183	74.3754	81.552	85.202	74.0647	66.7354	71.4437

## Sheet: Fig 5J
			Aggregation index (%)
	pCMV5/FLRT3		46.8012	33.0027	55.7902	42.2684	38.5828	39.1695	41.0619	59.5242	36.4676	48.3447	31.5221	32.3065	30.5338	54.9867	42.3261
	ADGRL3/FLRT3		94.962	93.4451	93.0134	88.1887	81.9195	74.9345	94.4921	89.2443	92.3815	86.6336	81.7822	86.1597	91.9957	93.3176	93.7794
	ADGRL3/FLRT3 + LK30		95.2415	93.526	92.6535	91.4968	91.0021	95.2703	91.0167	78.7464	77.2433	93.067	89.0583	87.4415	89.334	81.74	76.3047
	ADGRL3/FLRT3 + LK12		40.2871	38.0793	31.0931	53.7369	15.7313	34.7064	33.4456	27.7825	27.1034	26.6684

[truncated: 6 more sheets: Supp Fig. 1C, Supp Fig. 1H, Supp Fig. 4, Supp Fig. 5, Supp Fig. 8A, Supp Fig. 8B]
